# Supplementary material for: Deletion of CDKAL1 Affects High-Fat Diet–Induced Fat Accumulation and Glucose-Stimulated Insulin Secretion in Mice, Indicating Relevance to Diabetes
Source: PubMed Central journal article supplement (PMC3500257; doi:10.1371/journal.pone.0049055), 2012-11-16

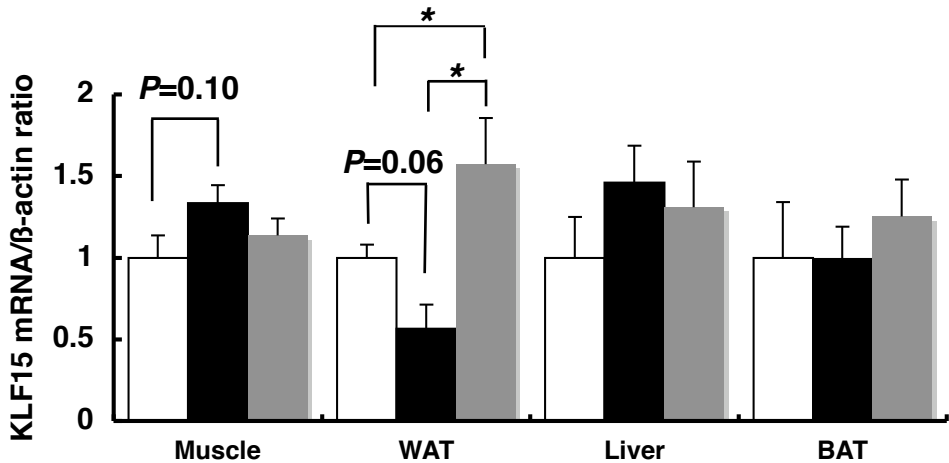

Supplement: pone.0049055.s006.pdf [file pone.0049055.s006.pdf]
