# Supplementary material for: Deletion of CDKAL1 Affects High-Fat Diet–Induced Fat Accumulation and Glucose-Stimulated Insulin Secretion in Mice, Indicating Relevance to Diabetes
Source: PLoS One. 2012 Nov 16;7(11):e49055. doi: 10.1371/journal.pone.0049055 (PMC3500257; doi:10.1371/journal.pone.0049055)
Supplement: Table S1 — Diet compositions. (XLS) [file pone.0049055.s007.xls]

## Sheet: ESM Table1
Table S1. Diet compositions
	Standard diet	High fat diet
Protein (%)	29	20
Carbohydrate (%)	58	35
Fat (%)	13	45
Saturated (%)	2.7	16.3
Monounsaturated (%)	3.3	20.4
Polyunsaturated (%)	6.7	8.3
Ratio of saturate/unsaturate	0.27	0.57
Standard diet and high fat diet were purchased from CLEA Japan and Research Diets, respectively.
The fat in the diets is from lard and it contains saturated, monounsaturated, and polyunsaturated fats; as for the standard diet, small amount (0.3% of the diet) is uncharacterized fatty acid.
