# Supplementary material for: Deletion of CDKAL1 Affects High-Fat Diet–Induced Fat Accumulation and Glucose-Stimulated Insulin Secretion in Mice, Indicating Relevance to Diabetes
Source: PLoS One. 2012 Nov 16;7(11):e49055. doi: 10.1371/journal.pone.0049055 (PMC3500257; doi:10.1371/journal.pone.0049055)
Supplement: Table S2 — A list of primers used for qRT-PCR analysis. (XLS) [file pone.0049055.s008.xls]

## Sheet: ESM Table2
Table S2. A list of primers used for qRT-PCR analysis
Gene Name	Upper sequence (5'-to-3')	Lower sequence (5'-to-3')
ADRB3	CCTTCCGTCGTCTTCTGTGT	AGAAGATGGGGATCAAGCAA
PPARG	TCATGACCAGGGAGTTCCTC	CAGCAGGTTGTCTTGGATGT
PPARGC1B	CCTTCCACCTGAGCTATGGA	TATTGGAAGGGCCTTGTCTG
UCP1	GTACCAAGCTGTGCGATGTC	TGGTCTCCCAGCATAGAAGC
UCP2	ACTGTGCCCTTACCATGCTC	CTGGGCAGAGGATGAAGAAA
UCP3	GGATGCCTACAGAACCATCG	AGCTCCAAAGGCAGAGACAA
SCD1	CAAACCCACCCCAGAGATAA	ACCTCAGAACTGCCCTTGAA
KLF15	CACCAAGAGCAGCCACCTCA	CGGGACACTGGTACGGCTTC
b-actin	CGCATCCTCTTCCTCCCT	CAGACAGCACTGTGTTGGCATAG
