# Supplementary material for: Deletion of CDKAL1 Affects High-Fat Diet–Induced Fat Accumulation and Glucose-Stimulated Insulin Secretion in Mice, Indicating Relevance to Diabetes
Source: PLoS One. 2012 Nov 16;7(11):e49055. doi: 10.1371/journal.pone.0049055 (PMC3500257; doi:10.1371/journal.pone.0049055)
Supplement: Table S4 — Cohort-wise BMI association of SNPs genotyped in two general Japanese populations, restricted to non-diabetics. (XLS) [file pone.0049055.s010.xls]

## Sheet: ESM Table4
Table S4. Cohort-wise BMI association of SNPs genotyped in two general Japanese populations, restricted to non-diabetics
					Amagasaki (n = 5,349)					Fukuoka (n = 11,307)					Combined (n = 16,656)
Chromo-some	Neighbouring gene	SNP rs #	Position (B37)	Allele tested	Tested allele freq.	BMI				Tested allele freq.	BMI				Tested allele freq.	BMI
						BETA (%)	SE (%SD)	P			BETA (%)	SE (%SD)	P			BETA (%)	SE (%SD)	P
3	IGF2BP2	rs4402960	185511687	T	0.317344	1.37274	2.01603	0.495957		0.315001	-2.58563	1.39357	0.0635655		0.315731	-1.30577	1.14635	0.254674
6	CDKAL1	rs4712523	20657564	G	0.428886	-3.49345	1.85705	0.0600023		0.432205	-3.32524	1.30202	0.0106654		0.43117	-3.38068	1.0661	0.00151874
8	SLC30A8	rs13266634	118184783	C	0.589882	0.228683	1.87519	0.902942		0.584533	-1.45169	1.32382	0.272846		0.586201	-0.892767	1.08148	0.409084
9	CDKN2A/B	rs2383208	22132076	A	0.572935	-2.93725	1.86541	0.115412		0.569389	-1.71446	1.31664	0.192893		0.570495	-2.12107	1.07569	0.0486296
10	HHEX	rs1111875	94462882	C	0.294698	-1.31684	1.99407	0.509039		0.281591	-2.20318	1.45094	0.128929		0.285678	-1.89636	1.17323	0.106017
10	TCF7L2	rs7903146	114758349	T	0.0367556	-7.28218	4.90458	0.137664		0.038976	-6.69678	3.4192	0.0501864		0.0382837	-6.88824	2.80488	0.0140568
11	KCNQ1	rs2237892	2839751	C	0.618407	-1.66645	1.88162	0.375849		0.61341	-3.48463	1.32172	0.00838963		0.614968	-2.88391	1.08155	0.0076657
16	FTO	rs9939609	53820527	A	0.184813	6.86956	2.34261	0.00337749		0.190455	5.08657	1.6522	0.00208435		0.188696	5.67886	1.35018	2.59928e-05
18	MC4R	rs12970134	57884750	A	0.164471	-0.189752	2.46598	0.938668		0.15579	4.76967	1.77413	0.00718885		0.158497	3.07819	1.44015	0.0325643
Effect sizes are indicated as beta per SD unit of phenotype.Two-tailed P values are shown in the table.
T2D-risk, FPG-increasing and BMI-increasing alleles reported in the previous studies are tested.
Although FTO rs9939609 and MC4R rs12970134 were previously tested for BMI association in the Japanese (ref.30), they were shown in the table for the purpose of comparison.
Part of the samples (414 individuals in the Amagasaki Study panel) were included in the GWA meta-analysis of BMI (ref.45,46), where proxy SNPs (r2>0.78 in HapMap JPT+CHB) were tested for SNP-BMI acid association at CDKAL1. For the purpose of comprehensive evaluation, all the Amagasaki Study samples consecutively-enrolled are included in the present study.
