# Supplementary material for: Deletion of CDKAL1 Affects High-Fat Diet–Induced Fat Accumulation and Glucose-Stimulated Insulin Secretion in Mice, Indicating Relevance to Diabetes
Source: PLoS One. 2012 Nov 16;7(11):e49055. doi: 10.1371/journal.pone.0049055 (PMC3500257; doi:10.1371/journal.pone.0049055)
Supplement: Table S5 — Meta-analysis of type 2 diabetes association at the CDKAL1 locus. (XLS) [file pone.0049055.s011.xls]

## Sheet: ESM Table5
Table S5. Meta-analysis of type 2 diabetes association at the CDKAL1 locus
		Sample size			Phenotypes in controls									Type 2 diabetes association at CDKAL1
Ethnicity	Reference	Cases	Controls		BMI, mean	(	SD	)	Age, mean	(	SD	)		SNP	OR	(95% CI)					P
Japanese	Takeuchi et al. Diabetes. 2009;58:1690-9.	6369	6406		22.7	(	2.9	)	65	(	7.1	)		rs4712523	1.27	(	1.21	,	1.33	)	7.243e-20
Japanese	Horikoshi et al. Diabetologia. 2007;50:2461-6.	864	864		23.8	(	3.7	)	69.5	(	6.8	)		rs4712523	1.1551	(	1.00714	,	1.32495	)	0.0348209
Japanese	Horikawa et al. J Clin Endocrinol Metab. 2008;93:3136-41.	1921	1622		22.5	(	3.1	)	70	(	7.5	)		rs4712523	1.28258	(	1.16439	,	1.4129	)	4.52988e-07
Japanese	Tabara et al. Diabetes. 2009;58:493-8.	506	402		23	(	3	)	59	(	9	)		rs7754840	1.321	(	1.093	,	1.596	)	0.002
Korean (SNUH)	Ng et al. Diabetes. 2008;57:2226-33.	761	632		23.6	(	3.1	)	64.7	(	3.6	)		rs7754840	1.24	(	1.07	,	1.44	)	0.005
Korean (KHGS)	Ng et al. Diabetes. 2008;57:2226-33.	799	1516		24.2	(	3.2	)	55.8	(	8.7	)		rs7754840	1.27	(	1.13	,	1.44	)	0.0001
Korean	Lee et al. J Hum Genet. 2008;53:991-8.	908	502		22.1	(	3	)	55	(	9.4	)		rs7754840	1.65	(	1.41	,	1.93	)	5e-11
Chinese Han	Wu et al. Diabetes. 2008;57:2834-42.	424	1908		24.2	(	3.40998	)	58.6	(	6	)		rs7754840	1.49	(	1.27	,	1.75	)	8.91e-07
Chinese Han	Liu et al. Diabetologia 2008;51:2134–7.	1912	2041		24.5	(	3.2	)	58.1	(	9	)		rs7754840	1.26	(	1.15	,	1.38	)	7.4e-07
Chinese Han	Han et al. BMC Med Genet. 2010;11:81.	1024	1005		25	(	3.3	)	58	(	9	)		rs10946398	1.27	(	1.11	,	1.45	)	0.0006
Chinese Han	Wen et al. PLoS One. 2010;5(2):e9153.	1165	1136		24.1	(	3	)	59.1	(	7.9	)		rs10946398	1.23	(	1.09	,	1.39	)	0.00071
Chinese	Hu et al. PLoS One. 2009;4(10):e7643.	1849	1785		23.57	(	3.25	)	57.39	(	12.37	)		rs7754840	1.127	(	1.027	,	1.238	)	0.0025
Hong Kong	Ng et al. Diabetes. 2008;57:2226-33.	1481	1530		21	(	3.7	)	25.3	(	14.4	)		rs7754840	1.29	(	1.17	,	1.43	)	1e-06
East Asians combined (heterogeneity I2=48.5%, P=0.025)					23.2964	(	3.33541	)	59.196	(	13.5894	)			1.26765	(	1.23279	,	1.30349	)	1.06898e-62
European (DGI)	Saxena et al. Science. 2007;316:1331-6.	6529	7252		27.6	(	3.7	)	58	(	10	)		rs7754840	1.08	(	1.03	,	1.14	)	0.0024
European (FUSION)	Scott et al. Science. 2007;316:1341-5.	2376	2432		26.8	(	7.4	)	64	(	17.3	)		rs7754840	1.12	(	1.03	,	1.22	)	0.0095
British	Zeggini et al. Science. 2007;316:1336-41.	5681	8284		25.9529	(	4.64655	)	49.9164	(	16.4131	)		rs10946398	1.16	(	1.1	,	1.22	)	1.3e-08
French	Cauchi et al. PLoS One. 2008;3:e2031.	3295	3595		24.87	(	3.31	)	56	(	10	)		rs7754840	1.23	(	1.13	,	1.33	)	1.6e-06
French	Cauchi et al. PLoS One. 2008;3:e2031.	937	1000		24.07	(	3.47	)	50	(	6	)		rs7754840	1.1	(	0.85	,	1.4	)	0.47
Austrian	Cauchi et al. PLoS One. 2008;3:e2031.	504	753		26.77	(	4	)	52	(	6	)		rs7754840	1	(	0.81	,	1.24	)	0.97
German	Herder et al. Horm Metab Res. 2008;40:722-6.	433	1438		27.7	(	4.3	)	61.9	(	10.2	)		rs7754840	1.3	(	1.11	,	1.53	)	0.00073
Europeans combined (heterogeneity I2=51.5%, P=0.054)					26.4339	(	4.60897	)	55.3092	(	13.9722	)			1.13606	(	1.10275	,	1.17039	)	2.22271e-17
Indian	Chauhan et al. Diabetes. 2010 Apr 27. [Epub ahead of print]	2462	2501		21.7788	(	2.27841	)	39.3861	(	14.4382	)		rs10946398	1.18	(	1.07	,	1.32	)	0.0016
Pima Indian	Rong et al. Diabetes. 2009;58:478-88.	1561	1940		35.7	(	8.2	)	31.1	(	14.5	)		rs7754840	1.06	(	0.93	,	1.22	)	0.38
Israeli Ashkenazi	Cauchi et al. PLoS One. 2008;3(5):e2031.	577	552		26	(	3.99	)	56	(	26	)		rs7754840	1.3	(	1.08	,	1.56	)	0.005
Morrocan	Cauchi et al. PLoS One. 2008;3(5):e2031.	521	423		27.23	(	5.3	)	55	(	12	)		rs7754840	1.2	(	0.99	,	1.46	)	0.06
Mexican	Cruz et al. Diabetes Metab Res Rev. 2010;26:261-70.	519	547		27.5	(	3.55	)	43.6	(	6.63	)		rs7754840	1.18	(	0.89689	,	1.55248	)	0.237
All combined (heterogeneity I2=64.5%, P<1E-04)															1.2012	(	1.178	,	1.22485	)	4.21748e-76
Association results were extracted from publications involving any of 3 SNPs at the CDKAL1 locus, rs10946398, rs7754840 and rs4712523, which were in strong LD (r2=1 in CEU, r2=0.98 in CHB+JPT) to each other.
There was significant cross-population heterogeneity in effect sizes (I2 = 96.4%, P<1.4×10-7) between East Asians and Europeans.
